# Supplementary material for: Extracellular S100β Disrupts Bergman Glia Morphology and Synaptic Transmission in Cerebellar Purkinje Cells
Source: PubMed Central journal article supplement (PMC6523464; doi:10.3390/brainsci9040080), 2019-04-12
Supplement: brainsci-09-00080-s001.pdf [file brainsci-09-00080-s001.pdf]

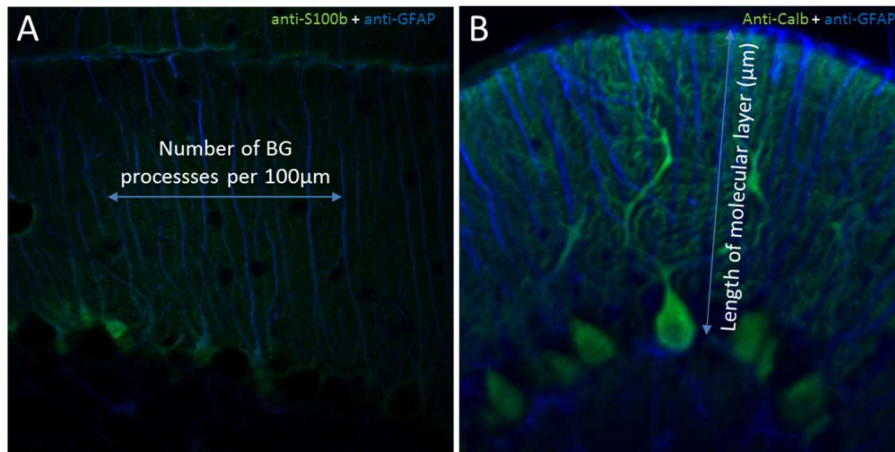

**Figure S1.** (A) Confocal image of S100 $\beta$ -injected area (anti-S100 $\beta$  and anti-GFAP staining). The line with two arrowheads illustrates the 100  $\mu$ m length, where the parameters of BG (Bergmann glia) processes were evaluated. (B) Confocal image to illustrate staining with anti-Calbindin and anti-GFAP antibodies. The line with two arrowheads illustrates the thickness of the cerebellar molecular layer.

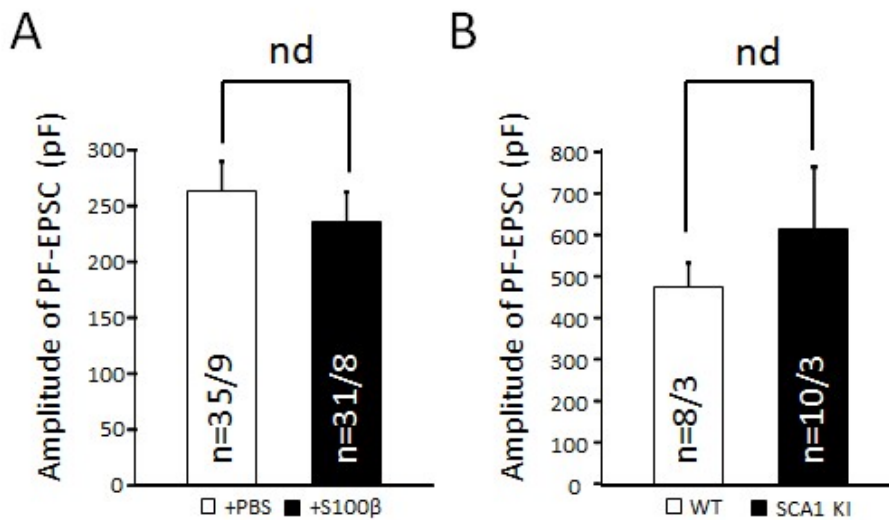

**Figure S2.** Electrophysiological characteristics of PCs. (A) The summary graph shows the average PF-EPSC amplitudes in PCs from PBS- and S100 $\beta$ -injected areas. There were no significant differences between the two groups. The numbers (n) of tested PCs and animals (PCs/animals) are indicated in the graph. (B) Average PF-EPSC amplitudes in PCs from three-week-old WT and SCA1 KI mice. Differences between the groups were not significant. The numbers (n) of tested PCs and animals (PCs/animals) are indicated in the graph.

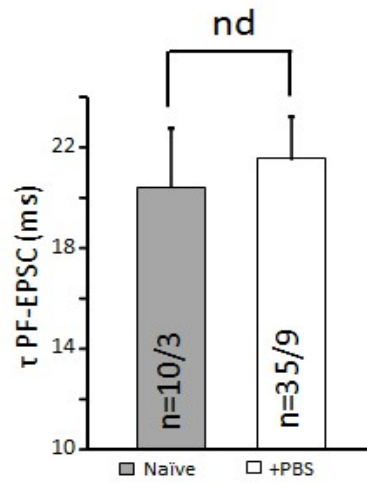

**Figure S3.** PBS injections do not alter decay time of PF-EPSC.
